# Supplementary material for: miR-204-5p and Platelet Function Regulation: Insight into a Mechanism Mediated by CDC42 and GPIIbIIIa
Source: PubMed Central journal article supplement — Thromb Haemost. 2021 May 3;121(9):1206–19. doi: 10.1055/a-1497-9649 (PMC8421094; doi:10.1055/a-1497-9649), 2021-05-03
Supplement: 10-1055-a-1497-9649-s200847.pdf [file 10-1055-a-1497-9649-s200847.pdf]

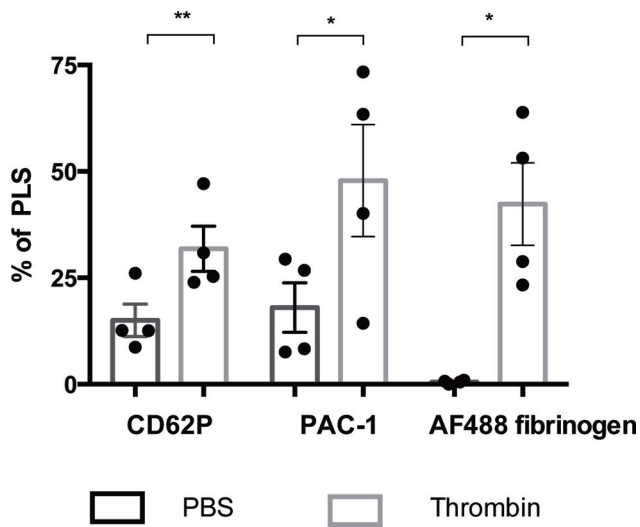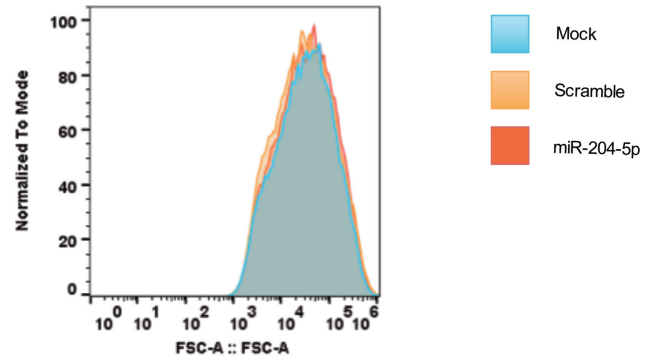

Supplementary Fig. S2 miR-204-5p does not impact PLS morphology. FACS analysis showed no difference in the normalized forward side scatter (FSC) of PLS after miR-204-5p transfection compared to mock condition. The figure is representative of four independent experiments. FACS, fluorescence-activated cell sorting; PLS, platelet-like structure.

Supplementary Fig. S1 PLS derived from CD34<sup>+</sup> cells are functional. Thrombin stimulation of PLS increased P-selectin secretion (CD62P), activation of GPIIb/IIIa receptors (PAC-1), and induced the adhesion of soluble fibrinogen by FACS compared to nonactivated PLS.  $n = 4$  independent experiments;  $*p < 0.05$ ,  $**p < 0.01$ . T test student. FACS, fluorescence-activated cell sorting; PLS, platelet-like structure.

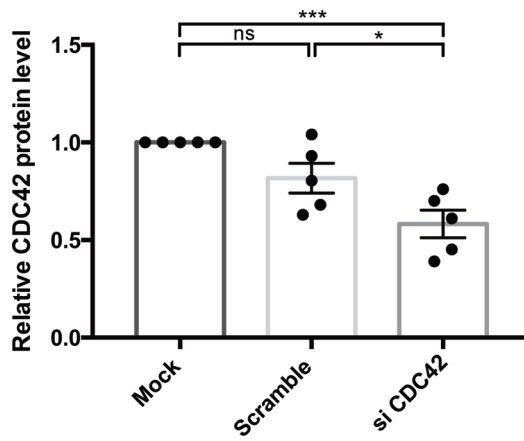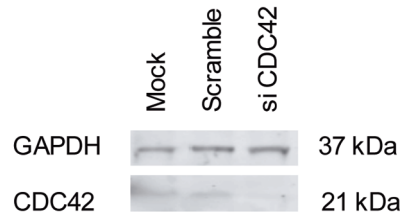

Supplementary Fig. S3 CDC42 silencing. Western blot analysis showed that transfection of siCDC42 decreased CDC42 protein expression.  $n = 5$  independent experiments;  $*p < 0.05$ ,  $***p < 0.001$ .
